# Supplementary material for: Dietary stigmastane-type saponins as promising dual-target directed inhibitors of SARS-CoV-2 proteases: a structure-based screening
Source: PubMed Central journal article supplement (PMC9042289; doi:10.1039/d1ra05976a), 2021-10-12
Supplement: RA-011-D1RA05976A-s001.pdf [file RA-011-D1RA05976A-s001.pdf]

## Supplementary Data

### Dietary stigmastane-type saponins as promising dual-target directed inhibitors of SARS-CoV-2 proteases: a structure-based screening

Oludare M. Ogunyemi<sup>1,4</sup>, Gideon A. Gyebi<sup>2</sup>, Ibrahim M. Ibrahim<sup>3</sup>, Charles O. Olaiya<sup>4</sup>, Joshua O. Ocheje<sup>5</sup>, Modupe M. Fabusiwa<sup>1</sup> Joseph O. Adebayo<sup>6</sup>

<sup>1</sup>Human Nutraceuticals and Bioinformatics Research Unit, Department of Biochemistry, Salem University, Lokoja, Nigeria

<sup>2</sup>Department of Biochemistry, Faculty of Science and Technology Bingham University, Karu, Nasarawa, Nigeria

<sup>3</sup>Department of Biophysics, Faculty of Sciences, Cairo University, Giza Egypt

<sup>4</sup>Nutritional and Industrial Biochemistry Unit, Department of Biochemistry, University of Ibadan, Nigeria;

<sup>5</sup>Department of Pure and Industrial Chemistry, Nnamdi Azikiwe University, Akwa, Nigeria

<sup>6</sup>Department of Biochemistry, Faculty of Life Sciences, University of Ilorin, Ilorin, Nigeria

#### \*Corresponding Author

Gideon Ampoma GYEBI

Email: [gideonagyebi@gmail.com](mailto:gideonagyebi@gmail.com)/[gyebi.gideon@binghamuni.edu.ng](mailto:gyebi.gideon@binghamuni.edu.ng)

Tel: +2347063983652

Address:

Department of Biochemistry, Faculty of Science and Technology

P.M.B 005, Karu, Nasarawa State, Nigeria

Orcid ID: 0000-0002-1945-1739

**Table S1:** Binding energies of phytochemicals docked in the active sites of SARS-CoV-2 3-Chymotrypsin-Like protein

| S/N | Compounds                                | Binding energies (Kcal/mol) |
|-----|------------------------------------------|-----------------------------|
| S1  | Alpha-Ketoamide 13b                      | -7.7                        |
| S2  | Ritonavir                                | -6.8                        |
| S3  | 10659                                    | -5.3                        |
| 1   | Vernonioside A22                         | -8.6                        |
| 2   | vernonioside D22                         | -8.4                        |
| 3   | Vernonioside A42                         | -8.3                        |
| 4   | Vernodalin                               | -8.1                        |
| 5   | vernonioside B32                         | -8.1                        |
| 6   | 11, 13-dihydrovernodalinalin             | -8.0                        |
| 7   | vernoniamyoside C2                       | -8.0                        |
| 8   | vernonioside B22                         | -8.0                        |
| 9   | vernonioside D2                          | -8.0                        |
| 10  | Vernomygdin                              | -7.9                        |
| 11  | Andrographoside                          | -7.8                        |
| 12  | Neoandrographolide                       | -7.8                        |
| 13  | vernoniamyoside A2                       | -7.8                        |
| 14  | Vernonioside A12                         | -7.8                        |
| 15  | Vernonioside A32                         | -7.8                        |
| 16  | Veronicoside                             | -7.8                        |
| 17  | 3,7,8-trimethoxy-1-hydroxy-xanthone2     | -7.7                        |
| 18  | 7-O-methylwogonin-5-glucoside2           | -7.7                        |
| 19  | Basilimoside                             | -7.7                        |
| 20  | vernodalinalin2                          | -7.7                        |
| 21  | vernoniamyoside D2                       | -7.7                        |
| 22  | 1,2-dihydroxy-6, 8-dimethoxy-xanthone2   | -7.6                        |
| 23  | 1,2,2,3-tetrahydrovernoodalin2           | -7.5                        |
| 24  | Andrographidoid C2                       | -7.5                        |
| 25  | Hydroxyvernolide                         | -7.5                        |
| 26  | Vernomygdin2.                            | -7.5                        |
| 27  | Andrographidoid D2                       | -7.4                        |
| 28  | chicoric acid                            | -7.4                        |
| 29  | Luteolin                                 | -7.4                        |
| 30  | Myricetin                                | -7.4                        |
| 31  | Vernolide                                | -7.4                        |
| 32  | vernoniamyoside B2                       | -7.4                        |
| 33  | 14-deoxy-11, 12-didehydroandrographolide | -7.3                        |
| 34  | Andrographidoid A2                       | -7.3                        |
| 35  | Dihydroskullcapflavone                   | -7.3                        |
| 36  | Nepetoidin A                             | -7.3                        |
| 37  | Vernodalol                               | -7.3                        |

|    |                                                           |      |
|----|-----------------------------------------------------------|------|
| 38 | vernonioside B12                                          | -7.3 |
| 39 | 5-hydroxy-7, 2, 3-trimethoxy flavone2                     | -7.2 |
| 40 | 5-hydroxy-7, 8, 2, 3-tetramethoxyflavone2                 | -7.2 |
| 41 | Hymenoxin                                                 | -7.2 |
| 42 | luteolin 7-O-glucoside2.                                  | -7.2 |
| 43 | 1, 8-dihydroxy-3, 7-dimethoxy-xanthone2                   | -7.1 |
| 44 | 5, 7, 2, 3-tetramethoxyflavonone2                         | -7.1 |
| 45 | 5-hydroxy-7,2,6-trimethoxyflavone2                        | -7.1 |
| 46 | 7-O-methyldihydrowogonin                                  | -7.1 |
| 47 | Andrographidoid B2                                        | -7.1 |
| 48 | Nevadensin                                                | -7.1 |
| 49 | Salvigenin                                                | -7.1 |
| 50 | vernonioside E2                                           | -7.1 |
| 51 | 1,2,3,15,11,13,2,3-octahydrovernodalin2                   | -7.0 |
| 52 | 1,2,11,13,2,3-hexahydrovernodalin2.                       | -7.0 |
| 53 | 4-deoxyandrographolide                                    | -7.0 |
| 54 | 7-O-methylwogonin                                         | -7.0 |
| 55 | 14-deoxy-15-isopropylidene-11,12-didehydroandrographolide | -7.0 |
| 56 | Andrograpanin                                             | -7.0 |
| 57 | Andrographolactone                                        | -7.0 |
| 58 | Andrographolide2                                          | -7.0 |
| 59 | isohamnetin                                               | -7.0 |
| 60 | Rosmarinic acid                                           | -7.0 |
| 61 | Vernolepin                                                | -7.0 |
| 62 | Vernomenin                                                | -7.0 |
| 63 | Xanthomicrol                                              | -7.0 |
| 64 | Apigenin 7,4'-dimethyl ether                              | -6.9 |
| 65 | Beta-Sitosterol                                           | -6.8 |
| 66 | 4,8-dihydroxy-2,7-dimethoxy-xanthone2                     | -6.7 |
| 67 | 4,15-dihydrovernodalin2                                   | -6.7 |
| 68 | DOG2                                                      | -6.5 |
| 69 | Epivernodalol2                                            | -6.5 |
| 70 | CAT2                                                      | -6.3 |
| 71 | beta_caryophyllene epoxide                                | -6.2 |
| 72 | humulene oxide                                            | -6.1 |
| 73 | Caryophyllene oxide                                       | -6.0 |
| 74 | beta_eusdemole                                            | -5.9 |
| 75 | alloaromadendrene                                         | -5.8 |
| 76 | alpha-Humulene                                            | -5.8 |
| 77 | cubebol                                                   | -5.8 |
| 78 | Germacrene D                                              | -5.8 |
| 79 | Guaiazulene2                                              | -5.8 |

|     |                      |      |
|-----|----------------------|------|
| 80  | Sinapic acid         | -5.8 |
| 81  | Spathulenol          | -5.8 |
| 82  | 4 epi cubebol        | -5.7 |
| 83  | alpha muurolol       | -5.7 |
| 84  | alphaCopaene         | -5.7 |
| 85  | Aromadendrene        | -5.7 |
| 86  | Caryophyllene        | -5.7 |
| 87  | epi cubenol          | -5.7 |
| 88  | muurolol2            | -5.7 |
| 89  | ylangene             | -5.7 |
| 90  | Andrographidoid E2   | -5.6 |
| 91  | chamigrene           | -5.6 |
| 92  | isolongifolol        | -5.6 |
| 93  | alpha Calacorene2    | -5.5 |
| 94  | alphaCubebene        | -5.5 |
| 95  | alpha-Muurolene      | -5.5 |
| 96  | beta- Copaene        | -5.5 |
| 97  | Beta Cubebene        | -5.5 |
| 98  | Bicyclogermacrene    | -5.5 |
| 99  | calamenene           | -5.5 |
| 100 | gamma Cadinene       | -5.5 |
| 101 | gamma-Cadinene       | -5.5 |
| 102 | iso-eugenol          | -5.5 |
| 103 | longifoline          | -5.5 |
| 104 | beta- Bourbonene     | -5.4 |
| 105 | beta -Selinene2      | -5.4 |
| 106 | Elemol               | -5.3 |
| 107 | Vernolic             | -5.3 |
| 108 | bisabolol            | -5.2 |
| 109 | Carvacrol            | -5.2 |
| 110 | cis-Sabinene hydrate | -5.2 |
| 111 | Methyl cinnamate     | -5.2 |
| 112 | alpha Bergamotene    | -5.1 |
| 113 | alpha-Elemene2       | -5.1 |
| 114 | Beta Elemene         | -5.1 |
| 115 | Isophytol2           | -5.1 |
| 116 | linoleic2            | -5.1 |
| 117 | Thymol acetate       | -5.1 |
| 118 | Beta bisabolene      | -5.0 |
| 119 | pinocarveol2         | -5.0 |
| 120 | Eugenol              | -4.9 |
| 121 | linalyl acetate      | -4.9 |
| 122 | Thymol               | -4.9 |
| 123 | Vanillin             | -4.9 |
| 124 | 1,8-Cineole          | -4.8 |
| 125 | carvone              | -4.8 |
| 126 | eucalyptol.          | -4.8 |
| 127 | methyl eugenol       | -4.8 |

|     |                                |      |
|-----|--------------------------------|------|
| 128 | Methyl salicylate <sup>2</sup> | -4.8 |
| 129 | beta -Thujone <sup>2</sup>     | -4.7 |
| 130 | carveol                        | -4.7 |
| 131 | isopinocampone                 | -4.7 |
| 132 | nerolidol                      | -4.7 |
| 133 | pCymen-8-ol                    | -4.7 |
| 134 | Pinocarvone                    | -4.7 |
| 135 | Terpinen-4-ol                  | -4.7 |
| 136 | Thymol methyl ether            | -4.7 |
| 137 | alpha-Terpineol                | -4.6 |
| 138 | fenchone                       | -4.6 |
| 139 | myrtanal                       | -4.6 |
| 140 | Neoisomenthol                  | -4.6 |
| 141 | trans-pinocarveol              | -4.6 |
| 142 | trans-Thujone                  | -4.6 |
| 143 | alpha-Terpinene                | -4.5 |
| 144 | Beta Phellandrene              | -4.5 |
| 145 | Borneol                        | -4.5 |
| 146 | Farnesene                      | -4.5 |
| 147 | gamma-3-Carene                 | -4.5 |
| 148 | Nerol                          | -4.5 |
| 149 | Terpinolene                    | -4.5 |
| 150 | trans-Sabinene hydrate         | -4.5 |
| 151 | alpha-Thujene                  | -4.4 |
| 152 | citronellol                    | -4.4 |
| 153 | gamma-Terpinene <sup>2</sup>   | -4.4 |
| 154 | Linalool                       | -4.4 |
| 155 | pCymene                        | -4.4 |
| 156 | 1,3,8-p-Menthatriene           | -4.3 |
| 157 | alpha-Phellandrene             | -4.3 |
| 158 | estragole                      | -4.3 |
| 159 | gama-2-Carene                  | -4.3 |
| 160 | Limonene                       | -4.3 |
| 161 | O-cymene <sup>2</sup>          | -4.3 |
| 162 | pCymenene                      | -4.3 |
| 163 | P-Tolylpropene                 | -4.3 |
| 164 | Beta Pinene                    | -4.2 |
| 165 | Pinene                         | -4.2 |
| 166 | alpha-Pinene                   | -4.1 |
| 167 | Sabinene                       | -4.1 |
| 168 | Camphene                       | -4.0 |
| 169 | Zbeta Ocimene                  | -4.0 |
| 170 | 1-Octen-3-ol                   | -3.9 |
| 171 | Ocimene                        | -3.9 |
| 172 | Myrcene                        | -3.7 |
| 173 | Hexenol                        | -3.4 |
| 174 | Obatoclax                      | -3.4 |
| 175 | cubenene                       | -3.3 |

|     |                |      |
|-----|----------------|------|
| 176 | Veronicoside A | -1.7 |
|-----|----------------|------|

**Table S2:** Binding energies of phytochemicals docked in the active sites of 3-Chymotrypsin-like and Papain-like proteases of SARS-CoV-2

| S/No | Phytochemicals                           | Binding energies (Kcal/mol) |                     |
|------|------------------------------------------|-----------------------------|---------------------|
|      |                                          | SARS-CoV-2<br>3CLpro        | SARS-CoV-2<br>PLpro |
| S1   | Alpha-Ketoamide 13b                      | <b>-7.7</b>                 |                     |
| S2   | Ritonavir                                | -6.8                        |                     |
| S3   | GRL0617                                  |                             | -6.7                |
| 1    | Vernonioside A22                         | <b>-8.6</b>                 | <b>-6.8</b>         |
| 2    | vernonioside D22                         | <b>-8.4</b>                 | -6.3                |
| 3    | Vernonioside A42                         | <b>-8.3</b>                 | <b>-7.2</b>         |
| 4    | Vernodaline                              | -8.1                        | -5.9                |
| 5    | vernonioside B32                         | -8.1                        | -6.1                |
| 6    | 11, 13-dihydrovernodalin                 | -8.0                        | -5.7                |
| 7    | vernoniamyoside C2                       | -8.0                        | <b>-6.7</b>         |
| 8    | vernonioside B22                         | -8.0                        | -5.9                |
| 9    | vernonioside D2                          | -8.0                        | -6.1                |
| 10   | Vernomygdin                              | -7.9                        | -5.3                |
| 11   | Andrographoside                          | -7.8                        | -6.2                |
| 12   | Neoandrographolide                       | -7.8                        | <b>-6.7</b>         |
| 13   | vernoniamyoside A2                       | -7.8                        | -6.2                |
| 14   | Vernonioside A12                         | -7.8                        | -6.2                |
| 15   | Vernonioside A32                         | -7.8                        | -6.2                |
| 16   | Veronicoside                             | -7.8                        | -6.5                |
| 17   | 3,7,8-trimethoxy-1-hydroxy-xanthone2     | <b>-7.7</b>                 | -6.3                |
| 17   | 7-O-methylwogonin-5-glucoside2           | <b>-7.7</b>                 | -6.3                |
| 18   | Basilimoside                             | <b>-7.7</b>                 | <b>-6.7</b>         |
| 19   | vernodalinalol2                          | <b>-7.7</b>                 | -6.3                |
| 20   | vernoniamyoside D2                       | <b>-7.7</b>                 | -6.0                |
| 21   | 1,2-dihydroxy-6, 8-dimethoxy-xanthone2   | -7.6                        | -5.9                |
| 22   | 1,2,2,3-tetrahydrovernodalin2            | -7.5                        | -5.4                |
| 23   | Andrographidoid C2                       | -7.5                        | -6.1                |
| 24   | Hydroxyvernolide                         | -7.5                        | -5.7                |
| 25   | Vernomygdin2.                            | -7.5                        | -5.9                |
| 26   | Andrographidoid D2                       | -7.4                        | -6.2                |
| 27   | chicoric acid                            | -7.4                        | -5.8                |
| 28   | Luteolin                                 | -7.4                        | -6.3                |
| 29   | Myricetin                                | -7.4                        | -6.0                |
| 30   | Vernolide                                | -7.4                        | -5.7                |
| 31   | vernoniamyoside B2                       | -7.4                        | -6.4                |
| 32   | 14-deoxy-11, 12-didehydroandrographolide | -7.3                        | -6.0                |
| 33   | Andrographidoid A2                       | -7.3                        | -5.9                |
| 34   | Dihydroskullcapflavone                   | -7.3                        | -5.9                |
| 35   | Nepetoidin A                             | -7.3                        | -6.0                |

|    |                                                           |      |             |
|----|-----------------------------------------------------------|------|-------------|
| 36 | Vernodalol                                                | -7.3 | -5.1        |
| 37 | vernonioside B12                                          | -7.3 | -5.8        |
| 38 | 5-hydroxy-7, 2, 3-trimethoxy flavone2                     | -7.2 | -5.6        |
| 39 | 5-hydroxy-7, 8, 2, 3- tetramethoxyflavone2                | -7.2 | -5.8        |
| 40 | Hymenoxin                                                 | -7.2 | -5.7        |
| 41 | luteolin 7-O-glucoside2.                                  | -7.2 | -6.5        |
| 42 | 1, 8-dihydroxy-3, 7-dimethoxy-xanthone2                   | -7.1 | -5.8        |
| 43 | 5, 7, 2, 3-tetramethoxyflavonone2                         | -7.1 | -5.5        |
| 44 | 5-hydroxy-7,2,6-trimethoxyflavone2                        | -7.1 | -5.3        |
| 45 | 7-O-methylwogonin                                         | -7.1 | -5.8        |
| 46 | Andrographidoid B2                                        | -7.1 | -5.9        |
| 47 | Nevadensin                                                | -7.1 | -5.8        |
| 48 | Salvigenin                                                | -7.1 | -5.8        |
| 49 | vernonioside E2                                           | -7.1 | -6.0        |
| 50 | 1,2,3,15,11,13,2,3-octahydrovernodalin2                   | -7.0 | -5.2        |
| 51 | 1,2,11,13,2,3-hexahydrovernodalin2.                       | -7.0 | -5.4        |
| 52 | 4-deoxyandrographolide                                    | -7.0 | -6.0        |
| 53 | 7-O-methylwogonin                                         | -7.0 |             |
| 54 | 14-deoxy-15-isopropylidene-11,12-didehydroandrographolide | -7.0 | -6.4        |
| 55 | Andrograpanin                                             | -7.0 | -5.7        |
| 56 | Andrographolactone                                        | -7.0 | <b>-7.0</b> |
| 57 | Andrographolide2                                          | -7.0 | -6.0        |
| 58 | isohamnetin                                               | -7.0 | -6.2        |
| 59 | Rosmarinic acid                                           | -7.0 | -5.9        |
| 60 | Vernolepin                                                | -7.0 | -5.8        |
| 61 | Vernomenin                                                | -7.0 | -5.4        |
| 62 | Xanthomicrol                                              | -7.0 | -5.6        |
| 63 | Apigenin 7,4'-dimethyl ether                              | -6.9 | -5.8        |
| 64 | Beta-Sitosterol                                           | -6.8 | <b>-6.8</b> |

*Figures in bold represent the top three compounds in view of binding scores.*

**Table S3:** Clusters obtained from the Clustering analysis of the MD simulation trajectories of unbound SARS-CoV-2 3CLpro and SARS-CoV-2 PLpro.

| Cluster Number | SARS-CoV-2 3CLpro<br>Frames | SARS-CoV-2 PLpro<br>Frames |
|----------------|-----------------------------|----------------------------|
| Cluster 1      | f273-s511                   | f19-s86                    |
| Cluster 2      | f638-s81                    | f796-s102                  |
| Cluster 3      | f61-s158                    | f762-s251                  |
| Cluster 4      | f919-s250                   | f154-s561                  |



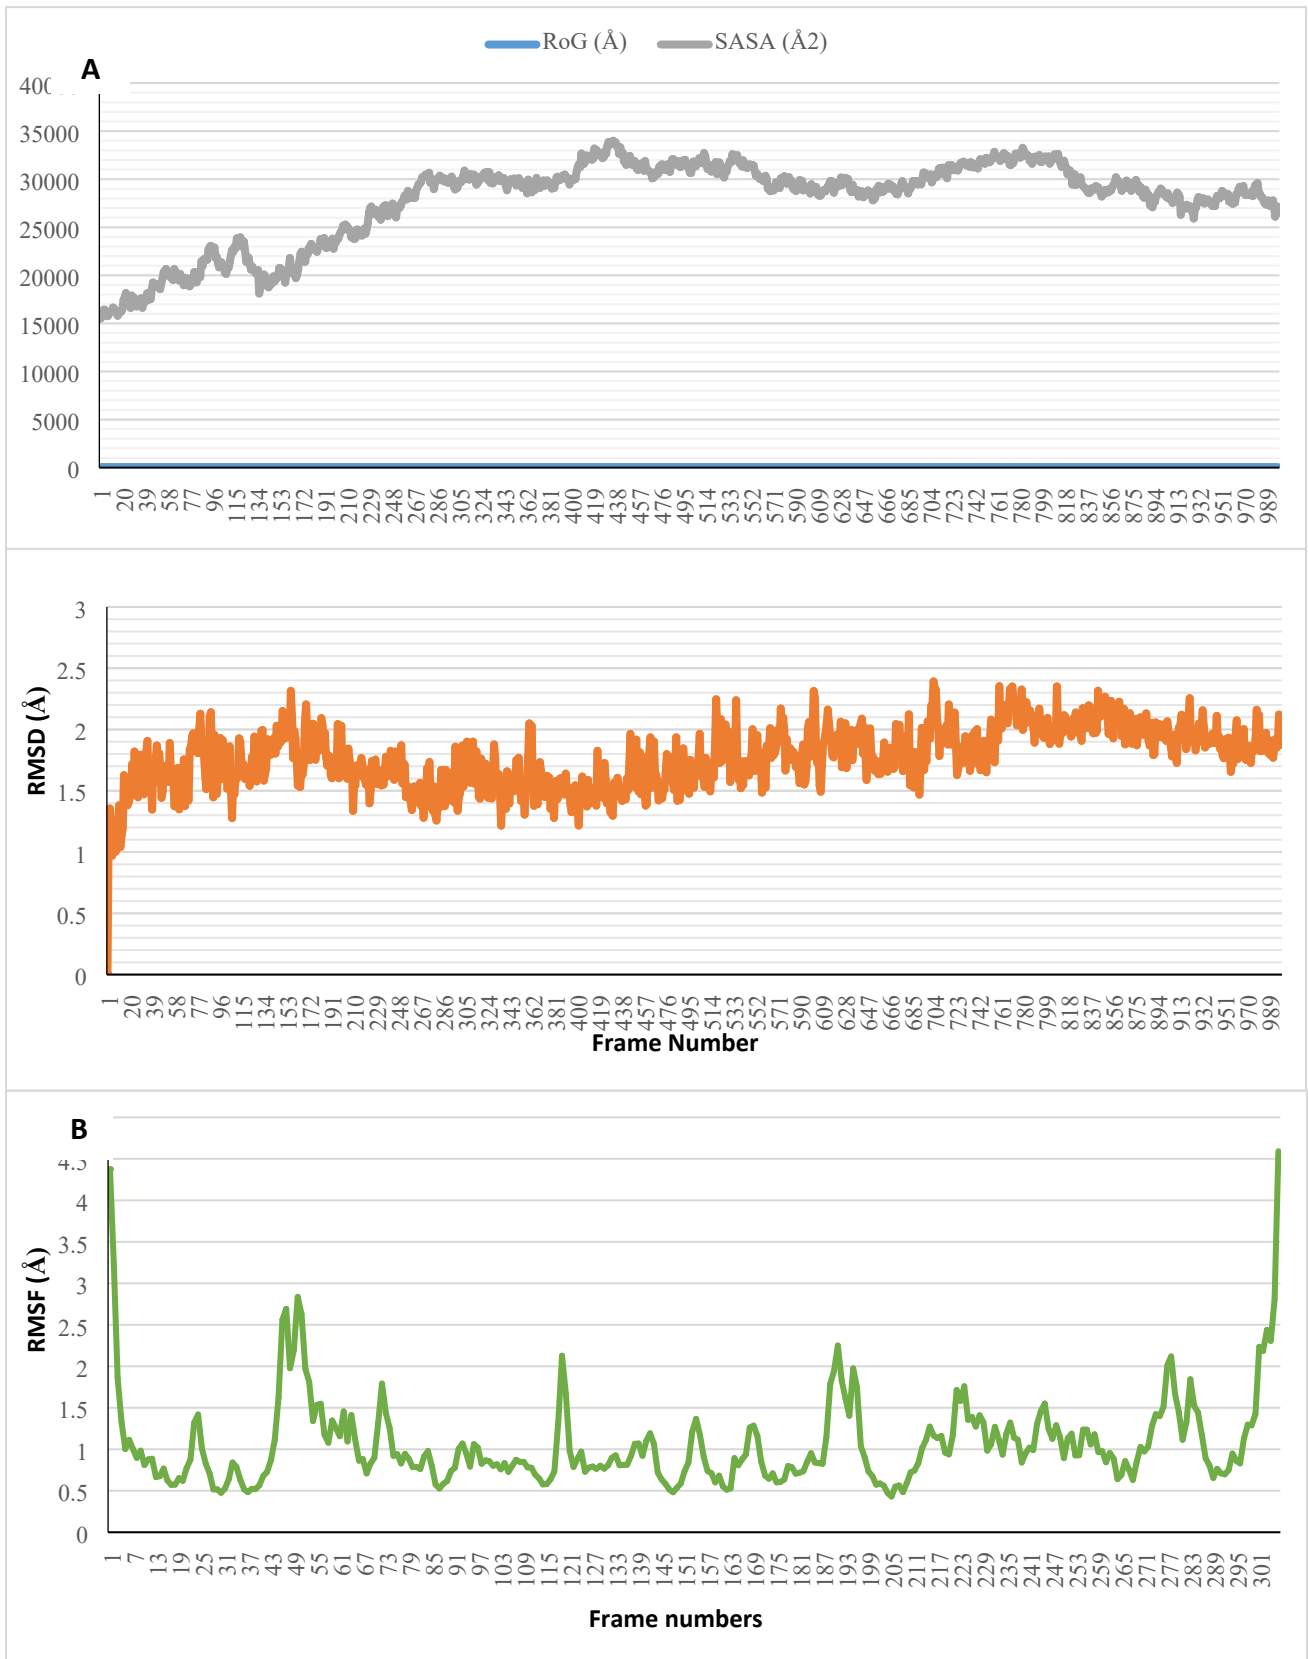

Figure S1: (A) The SASA (Grey line), RoG (Blue line); (B) the RMSD (Red line) and (C) RMSF (Green line) plots of molecular dynamics (MD) simulation of SARS-CoV-2 3CLpro.

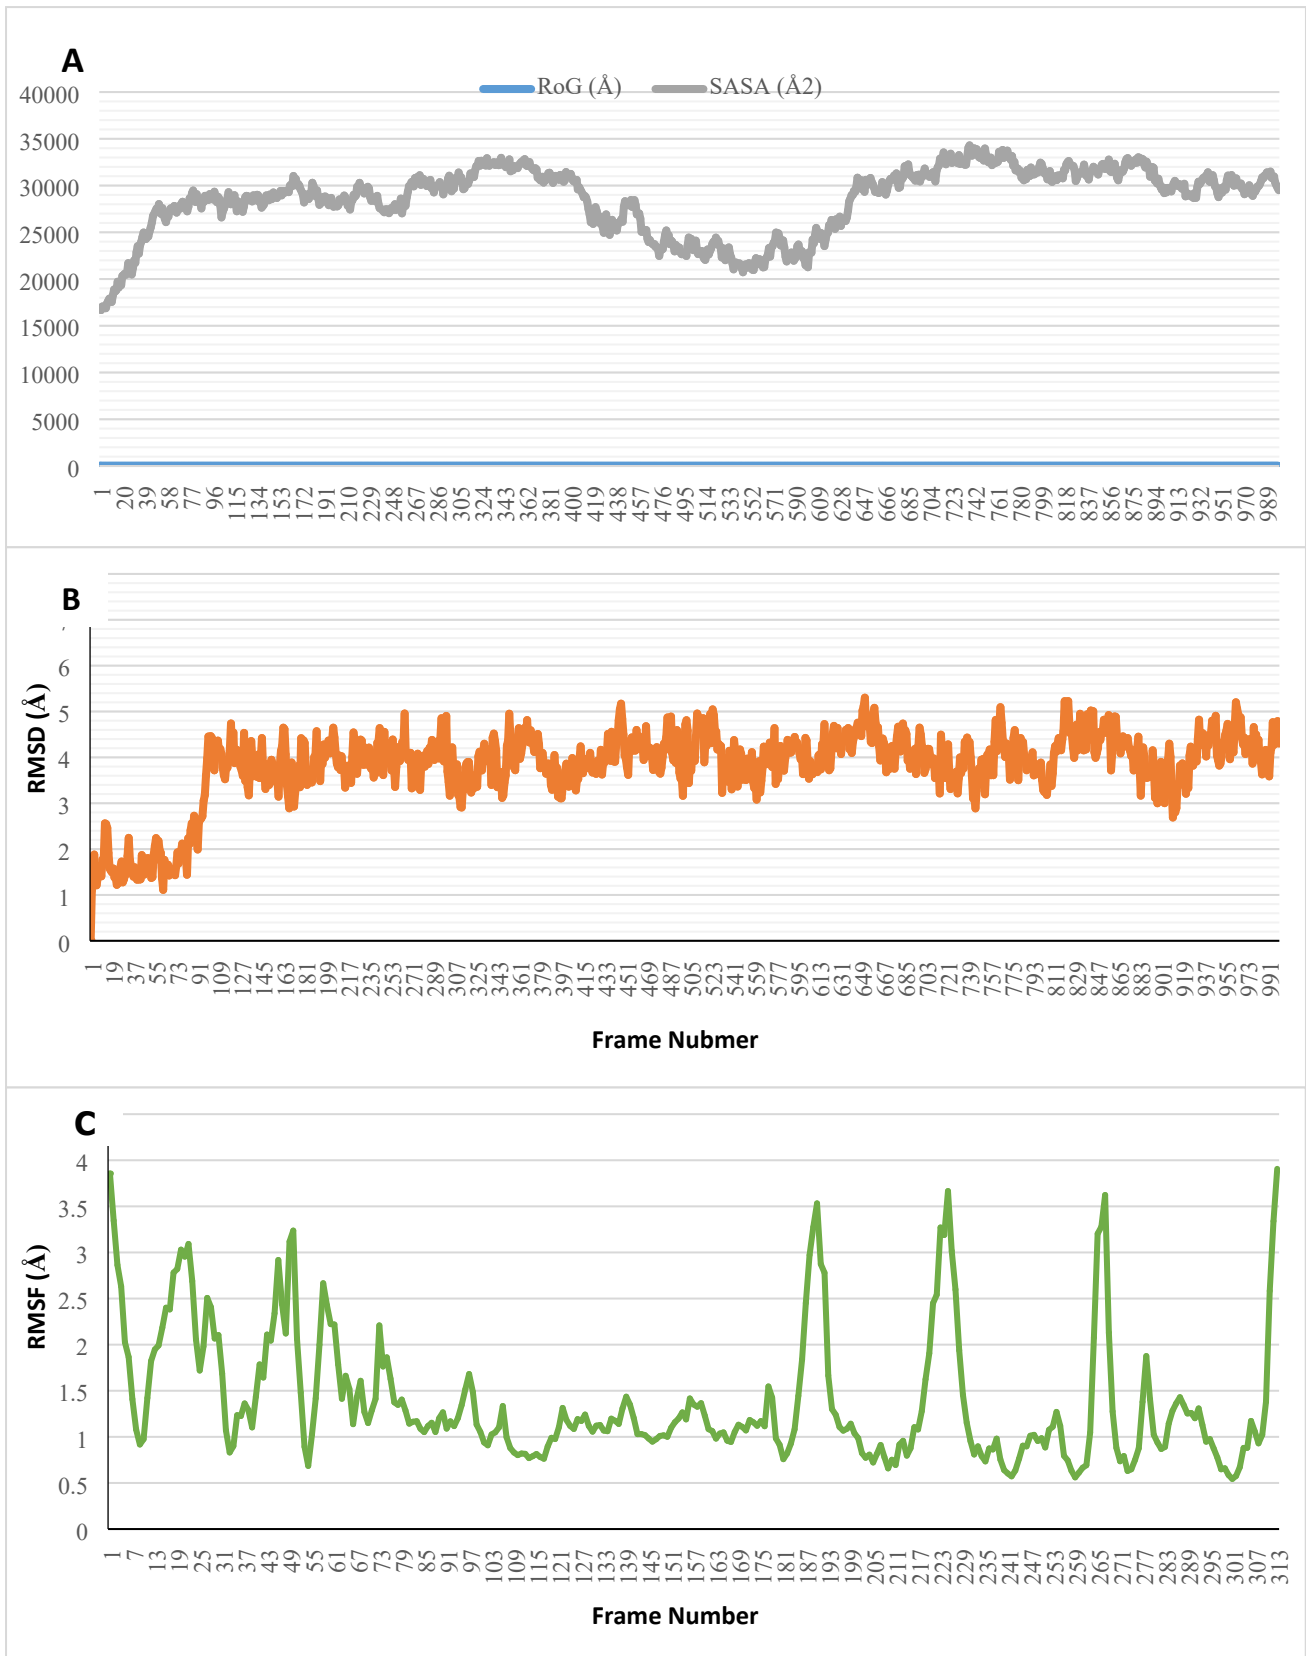

Figure S2: (A) The SASA (Grey line), RoG (Blue line); (B) the RMSD (Red line) and (C) RMSF (Green line) plots of molecular dynamics (MD) simulation of SARS-CoV-2 3CLpro.
